# Supplementary material for: Pruriception and neuronal coding in nociceptor subtypes in human and nonhuman primates
Source: eLife. 2021 Apr 23;10:e64506. doi: 10.7554/eLife.64506 (PMC8064749; doi:10.7554/eLife.64506)
Supplement: Figure 1—source data 1. [file elife-64506-fig1-data1.xlsx]

## Sheet: Sheet1
	Mrgprd single	Trpv1 single	Mrgprd-Trpv1 double		% Mrgprd single	% Trpv1 single	% Trpv1-Mrgprd double/Trpv1	% Mrgprd-Trpv1 double/Mrgprd
donor 1	8	208	105		7.07965	66.4537	33.5463	92.9204
donor 2	0	42	15		0	73.6842	26.3158	100
donor 3	9	172	141		6	54.9521	45.0479	94
donor 4	14	310	218		6.03448	58.7121	41.2879	93.9655
SUM	31	732	479
				MEAN	4.77853	63.4505	36.5495	95.2215
				SEM	1.61242	4.16757	4.16757	1.61242
	Mrgprx1 single	Mrgprd single	Mrgprx1-Mrgprd double		% Mrgprx1 single	% Mrgprd single	% Mrgprx1-Mrgprd double/Mrgprd	% Mrgprx1-Mrgprxd double/Mrgprx1
Donor 1	2	5	45		4.25532	10	90	95.7447
Donor 2	16	20	117		12.0301	14.5985	85.4015	87.9699
Donor 3	6	15	148		3.8961	9.20245	90.7975	96.1039
Donor 4	3	6	70		4.10959	7.89474	92.1053	95.8904
SUM	27	46	380
				MEAN	6.07277	10.4239	89.5761	93.9272
				SEM	1.98714	1.45762	1.45762	1.98714
	Mrgprx1 single	Trpv1 single	Mrgprx1-Trpv1 double		% Mrgprx1 single	% Trpv1 single	% Trpv1-Mrgprx1 double/Trpv1	% Trpv1-Mrgprx1 double/Mrgprx1
Donor 1	0	198	57		0	77.6471	22.3529	100
Donor 2	0	39	22		0	63.9344	36.0656	100
Donor 3	0	262	124		0	67.8756	32.1244	100
Donor 4	0	345	226		0	60.4203	39.5797	100
SUM	0	844	429
				MEAN	0	67.4694	32.5306	100
				SEM	0	3.7186	3.7186	0
