# Supplementary material for: Pruriception and neuronal coding in nociceptor subtypes in human and nonhuman primates
Source: eLife. 2021 Apr 23;10:e64506. doi: 10.7554/eLife.64506 (PMC8064749; doi:10.7554/eLife.64506)
Supplement: Figure 2—source data 1. [file elife-64506-fig2-data1.xlsx]

## Sheet: Fig 2A
Fiber ID	5 min APs ALA corrected for baseline & vehicle	5 min APs BAM8-22 corrected for baseline & BAM 8-18
AH04.01C	114	0
AH04.02C	51	49
AH15.01C	165	15
AH15.02C	59	61
AH44.03C	57	34
AH51.01C	48	56
AH51.04C	103	66
AH78.01C	89	0
AH79.01C	58	62
AH84.01C	81	45
AH84.03C	135	23
AH85.01C	210	0
AH91.01C	77	57
AH91.02C	66	120
AH94.02C	118	32
AH94.03C	101	55
AI33.03C	84	270
AI38.01C	4	170
AI44.01C	36	9
AI46.02C	116	1
AI47.02C	63	0
AI50.03C	0	97
AI51.01C	53	62
AI51.02C	33	135
AI55.03C	115	6
AI55.04C	111	4
AI58.02C	81	10
AI58.04C	61	14
AI77.01C	129	54
AH04.03C	0	110
AH09.01C	35	231
AH72.02C	2	188
AH78.02C	2	158
AH84.02C	0	120
AH85.03C	0	91
AH85.04C	0	39
AH87.01C	1	235
AI01.01C	0	129
AI01.02C	2	157
AI12.03C	0	143
AI40.03C	0	71
AI44.03C	5	84
AI46.01C	72	0
AI46.03C	3	0
AI47.01C - F1	1	12
AI49.02C	6	60
AI49.03C	3	40
AI50.01C	0	198
AI50.02C	43	29
AI51.03C	38	36
AI52.01C	0	89
AI53.01C	1	103
AI53.02C	0	29
AI55.05C	11	45
AI58.01C	1	98
AI75.01C	6	184
AI76.01C	4	58
AI76.02C	9	97
AI76.04C	32	13
AI81.01C	43	67
AH08.03C	0	322
AI33.01C	83	1
AI40.01C	58	66
AI40.02C	110	115
AI44.04C	88	1
AI49.01C	71	21
Average	47.697	74.9545
SEM	6.0518	8.88448
Count	66	66

## Sheet: Fig 2B
	BAM+ only	ALA+ only	BAM+ALA+	unresponsive	Sum
n	26	11	28	1	66

## Sheet: Fig 2C
average gives the average number of action potentials in 10s bin except insertion (15s) and injection (3s)
		BAM8-18 response in BAM8-22 responsive CMHs (n=54)		BAM8-22 response CMHs (n=54)		ECF response in ALA responsive CMHs (n=39)		ALA response CMHs (n=39)
Time (s)	Tim (min)	average	SEM	average	SEM	average	SEM	average	SEM
-68	-1.13333	0	0	0.0185185	0.0185185	0	0	0.025641	0.025641
-58	-0.966667	0	0	0	0	0.025641	0.025641	0.025641	0.025641
-48	-0.8	0.0185185	0.0185185	0.0185185	0.0185185	0.025641	0.025641	0.025641	0.025641
-38	-0.633333	0.0740741	0.044642	0	0	0.025641	0.025641	0.025641	0.025641
-28	-0.466667	0.0185185	0.0185185	0	0	0	0	0	0
-18	-0.3	0.0925926	0.060677	0.0185185	0.0185185	0.025641	0.025641	0.0769231	0.043227
-3	-0.05	12.963	1.60319	12.1481	1.54287	13.6667	2.34516	19.5897	2.64746
0	0	6.35185	1.04348	13.5556	1.71679	9.12821	1.37216	14.5385	1.8045
10	0.166667	0.685185	0.18089	40.6481	4.05312	0.717949	0.289139	18.8205	2.0696
20	0.333333	0.277778	0.155083	12.0741	1.79054	0.102564	0.0804414	8.58974	1.42832
30	0.5	0.277778	0.189554	5.42593	0.863744	0.0512821	0.0512821	4.66667	0.777842
40	0.666667	0.240741	0.111952	3.38889	0.628586	0.0769231	0.043227	4.10256	0.929204
50	0.833333	0.148148	0.0967949	3.03704	0.591084	0	0	5.20513	0.976913
60	1	0.0740741	0.044642	3.14815	0.52897	0.0512821	0.0357816	3.28205	0.487286
70	1.16667	0.037037	0.0259409	2.09259	0.370344	0.102564	0.0614146	2.58974	0.398577
80	1.33333	0.037037	0.0259409	2.46296	0.498574	0.025641	0.025641	3.23077	0.497581
90	1.5	0.0185185	0.0185185	2.14815	0.456652	0	0	2.66667	0.375234
100	1.66667	0.037037	0.0259409	1.62963	0.293532	0.0769231	0.043227	2.51282	0.251505
110	1.83333	0.0740741	0.0359736	1.68519	0.315923	0	0	2.35897	0.290393
120	2	0.0185185	0.0185185	1.68519	0.329987	0.025641	0.025641	1.97436	0.295004
130	2.16667	0.0185185	0.0185185	1.42593	0.274214	0	0	1.97436	0.266145
140	2.33333	0.0185185	0.0185185	1.35185	0.319588	0	0	1.76923	0.263531
150	2.5	0	0	1.2037	0.283952	0	0	1.53846	0.210539
160	2.66667	0	0	1.11111	0.25032	0	0	1.5641	0.216695
170	2.83333	0.0185185	0.0185185	1	0.196048	0.025641	0.025641	1.38462	0.228282
180	3	0.0185185	0.0185185	1.12963	0.27478	0	0	1.20513	0.176865
190	3.16667	0	0	0.648148	0.158957	0	0	0.897436	0.159261
200	3.33333	0.0185185	0.0185185	0.87037	0.203131	0	0	1.20513	0.19501
210	3.5	0	0	0.759259	0.177204	0	0	1.10256	0.163443
220	3.66667	0.0185185	0.0185185	0.648148	0.175664	0	0	0.871795	0.184338
230	3.83333	0	0	0.648148	0.215015	0.025641	0.025641	0.948718	0.164077
240	4	0.037037	0.037037	0.518519	0.123259	0	0	1.28205	0.207643
250	4.16667	0.0555556	0.031464	0.574074	0.19354	0	0	1.05128	0.197654
260	4.33333	0	0	0.462963	0.10807	0	0	0.74359	0.136062
270	4.5	0	0	0.277778	0.09315	0	0	0.871795	0.191519
280	4.66667	0	0	0.518519	0.17682	0	0	0.897436	0.154967
290	4.83333	0.0185185	0.0185185	0.296296	0.0975938	0	0	0.820513	0.115422
300	5	0	0	0.444444	0.18251	0	0	1.05128	0.172106
							(n=9)
							0.0521657
							0.666667
							0.29862
							0.400169
							0.365541
							0.357591
							0.3383
							0.285441
							0.249995
							0.16445
							0.194076
