# Supplementary material for: Pruriception and neuronal coding in nociceptor subtypes in human and nonhuman primates
Source: eLife. 2021 Apr 23;10:e64506. doi: 10.7554/eLife.64506 (PMC8064749; doi:10.7554/eLife.64506)
Supplement: Figure 3—source data 1. [file elife-64506-fig3-data1.xlsx]

## Sheet: Fig 3 F & G
average gives the average number of action potentials in 10s bin, except insertion (15s) and injection (3s)
			ECF response in QCs (n=29)		ALA response in QCs (n=29)		BAM8-18 response in QCs (n=29)		BAM8-22 response in QCs (n=29)			ECF response in SCs (n=31)		ALA response in SCs (n=31)		BAM8-18 response in SCs (n=31)		BAM8-22 response in SCs (n=31)
Time (s)	Tim (min)		average	SEM	average	SEM	average	SEM	average	SEM		average	SEM	average	SEM	average	SEM	average	SEM
-68	-1.13333		0	0	0.0344828	0.0344828	0	0	0.0344828	0.0344828		0.0322581	0.0322581	0	0	0	0	0	0
-58	-0.966667		0.0344828	0.0344828	0.0344828	0.0344828	0	0	0	0		0	0	0.0322581	0.0322581	0	0	0	0
-48	-0.8		0.0344828	0.0344828	0.0344828	0.0344828	0.0344828	0.0344828	0	0		0	0	0	0	0.0322581	0.0322581	0.0322581	0.0322581
-38	-0.633333		0	0	0.0344828	0.0344828	0.103448	0.0759963	0	0		0.0322581	0.0322581	0.0967742	0.071163	0.0645161	0.044853	0	0
-28	-0.466667		0	0	0	0	0.0689655	0.0478872	0	0		0	0	0	0	0	0	0	0
-18	-0.3		0.0344828	0.0344828	0.103448	0.0575533	0.0689655	0.0478872	0.0344828	0.0344828		0	0	0	0	0.129032	0.100984	0	0
-3	-0.05		15.8276	2.86866	20.4483	3.25425	13.7931	2.36163	12.4483	2.32442		11.2903	2.15586	10.9355	1.91987	10.1613	1.70836	10.5161	1.65124
0	0		9.44828	1.58704	15.3103	2.10214	7.58621	1.5831	11.9655	2.44016		7.67742	1.35312	9.48387	1.21095	4.03226	0.948665	12.4194	1.80904
10	0.166667		0.827586	0.374919	19.1379	2.60008	0.482759	0.251207	21.3448	3.69405		1.12903	0.376006	2.70968	0.677112	0.677419	0.204188	45.2903	5.97831
20	0.333333		0.137931	0.107869	9.44828	1.81983	0.172414	0.140976	5.51724	1.62691		0.258065	0.14641	1.45161	0.416949	0.419355	0.265485	14.1613	2.53708
30	0.5		0.0689655	0.0689655	4.37931	0.93957	0.0344828	0.0344828	2.51724	0.804269		0.354839	0.234399	0.935484	0.289365	0.451613	0.327384	6.03226	1.09297
40	0.666667		0.103448	0.0575533	4.34483	1.21999	0.103448	0.103448	1.51724	0.535951		0.0645161	0.0645161	0.645161	0.272576	0.322581	0.169675	3.35484	0.771186
50	0.833333		0	0	5.13793	1.20111	0.0689655	0.0478872	2.2069	0.810004		0.0322581	0.0322581	0.548387	0.277619	0.193548	0.163427	2.58065	0.550218
60	1		0.0344828	0.0344828	3.24138	0.629049	0.0689655	0.0478872	2.41379	0.679607		0.0645161	0.044853	0.741935	0.258065	0.0645161	0.0645161	2.16129	0.356497
70	1.16667		0.0689655	0.0689655	3	0.50123	0	0	0.862069	0.246773		0.129032	0.0767896	0.387097	0.136606	0.0645161	0.044853	2.06452	0.449457
80	1.33333		0	0	3.58621	0.649966	0.0689655	0.0478872	1.72414	0.621647		0.0645161	0.044853	0.483871	0.166372	0.0645161	0.044853	1.77419	0.343009
90	1.5		0	0	2.96552	0.479847	0.0689655	0.0478872	1.82759	0.6967		0.0967742	0.071163	0.419355	0.152218	0	0	1.41935	0.292465
100	1.66667		0.0689655	0.0478872	2.51724	0.296202	0.0344828	0.0344828	1	0.350931		0.0967742	0.0539781	0.354839	0.182859	0.0322581	0.0322581	1.35484	0.309521
110	1.83333		0	0	2.55172	0.366673	0	0	1.13793	0.507879		0.0322581	0.0322581	0.387097	0.15847	0.0967742	0.0539781	1.6129	0.302951
120	2		0.0344828	0.0344828	2.17241	0.371619	0.0344828	0.0344828	1.2069	0.474418		0.0645161	0.044853	0.258065	0.092373	0	0	1.29032	0.301229
130	2.16667		0	0	2	0.347404	0.0344828	0.0344828	0.827586	0.384647		0.0645161	0.044853	0.290323	0.124378	0.0322581	0.0322581	1.51613	0.307158
140	2.33333		0	0	1.93103	0.336349	0	0	1.06897	0.496121		0.0645161	0.0645161	0.193548	0.107956	0.0322581	0.0322581	1.22581	0.336681
150	2.5		0	0	1.72414	0.242608	0	0	0.689655	0.397354		0	0	0.129032	0.0612054	0	0	1.22581	0.277119
160	2.66667		0	0	1.72414	0.262127	0	0	0.758621	0.363532		0.0645161	0.0645161	0.129032	0.0767896	0	0	1.12903	0.281096
170	2.83333		0.0344828	0.0344828	1.37931	0.295341	0.0344828	0.0344828	0.586207	0.274163		0	0	0.258065	0.10336	0.0322581	0.0322581	1.03226	0.214946
180	3		0	0	1.37931	0.201067	0	0	0.862069	0.445901		0.0322581	0.0322581	0.16129	0.104694	0.0322581	0.0322581	1.03226	0.238652
190	3.16667		0	0	1	0.198517	0.0344828	0.0344828	0.482759	0.256063		0.0322581	0.0322581	0.129032	0.0612054	0	0	0.548387	0.129836
200	3.33333		0	0	1.41379	0.240675	0.0344828	0.0344828	0.655172	0.322688		0.0967742	0.0539781	0.0645161	0.044853	0	0	0.741935	0.166996
210	3.5		0	0	1.10345	0.200644	0.0344828	0.0344828	0.689655	0.281198		0	0	0.193548	0.0857523	0	0	0.548387	0.166163
220	3.66667		0	0	1	0.238013	0.0344828	0.0344828	0.310345	0.211163		0	0	0.0967742	0.0539781	0	0	0.806452	0.233806
230	3.83333		0.0344828	0.0344828	1	0.210559	0	0	0.689655	0.368406		0	0	0.129032	0.0612054	0	0	0.387097	0.151533
240	4		0	0	1.34483	0.273077	0.103448	0.0759963	0.310345	0.149741		0.0322581	0.0322581	0.193548	0.0857523	0	0	0.548387	0.166163
250	4.16667		0	0	1.24138	0.236222	0.103448	0.0575533	0.517241	0.320178		0.0322581	0.0322581	0.16129	0.104694	0.0322581	0.0322581	0.483871	0.166372
260	4.33333		0	0	0.793103	0.167415	0	0	0.241379	0.128031		0.0322581	0.0322581	0.0967742	0.0539781	0	0	0.580645	0.144982
270	4.5		0	0	0.931034	0.247803	0	0	0.137931	0.107869		0.0322581	0.0322581	0.193548	0.0857523	0	0	0.322581	0.126041
280	4.66667		0	0	1	0.198517	0	0	0.448276	0.291869		0.0322581	0.0322581	0.0967742	0.0539781	0	0	0.451613	0.152673
290	4.83333		0	0	0.896552	0.134502	0.0344828	0.0344828	0.137931	0.0819128		0.0322581	0.0322581	0.0322581	0.0322581	0.0322581	0.0322581	0.419355	0.152218
300	5		0	0	1.13793	0.225931	0	0	0.551724	0.287619		0	0	0.16129	0.0671505	0	0	0.322581	0.175898
								(n=9)
								0.0521657
								0.666667
								0.29862
								0.400169
								0.365541
								0.357591
								0.3383
								0.285441
								0.249995
								0.16445
								0.194076
