# Supplementary material for: Pruriception and neuronal coding in nociceptor subtypes in human and nonhuman primates
Source: eLife. 2021 Apr 23;10:e64506. doi: 10.7554/eLife.64506 (PMC8064749; doi:10.7554/eLife.64506)
Supplement: Figure 4—source data 1. [file elife-64506-fig4-data1.xlsx]

## Sheet: Sheet1
Fiber ID	SEX	QC/SC	5 min APs ALA corrected for baseline & vehicle	5 min APs BAM8-22 corrected for baseline & vehicle	Responded to BALA ONLY (0 = NO, 1 = YES)	Responded to BAM ONLY (0 = NO, 1 = YES)	Responded to Both (0 = NR, 1 = responded)
AH04.01C	Male	QC	114	0	1	0	0
AH04.02C	Male	QC	51	49	0	0	1
AH15.01C	Male	QC	165	15	0	0	1
AH15.02C	Male	QC	59	61	0	0	1
AH44.03C	Male	QC	57	34	0	0	1
AH51.01C	Male	QC	48	56	0	0	1
AH51.04C	Male	QC	103	66	0	0	1
AH78.01C	Male	QC	89	0	1	0	0
AH79.01C	Male	QC	58	62	0	0	1
AH84.01C	Male	QC	81	45	0	0	1
AH84.03C	Male	QC	135	23	0	0	1
AH85.01C	Male	QC	210	0	1	0	0
AH91.01C	Male	QC	77	57	0	0	1
AH91.02C	Male	QC	66	120	0	0	1
AH94.02C	Male	QC	118	32	0	0	1
AH94.03C	Male	QC	101	55	0	0	1
AI33.03C	Female	QC	84	270	0	0	1
AI38.01C	Female	QC	4	170	0	1	0
AI44.01C	Female	QC	36	9	1	0	0
AI46.02C	Female	QC	116	1	1	0	0
AI47.02C	Male	QC	63	0	1	0	0
AI50.03C	Male	QC	0	97	0	1	0
AI51.01C	Male	QC	53	62	0	0	1
AI51.02C	Male	QC	33	135	0	0	1
AI55.03C	Male	QC	115	6	1	0	0
AI55.04C	Male	QC	111	4	1	0	0
AI58.02C	Male	QC	81	10	0	0	1
AI58.04C	Male	QC	61	14	0	0	1
AI77.01C	Female	QC	129	54	0	0	1
				Responders	8	2	19
				Count	29	29	29
	QC	average	83.3793	51.9655
	QC	SEM	8.42197	11.175
AH04.03C	Male	SC	0	110	0	1	0
AH09.01C	Male	SC	35	231	0	0	1
AH72.02C	Male	SC	2	188	0	1	0
AH78.02C	Male	SC	2	158	0	1	0
AH84.02C	Male	SC	0	120	0	1	0
AH85.03C	Male	SC	0	91	0	1	0
AH85.04C	Male	SC	0	39	0	1	0
AH87.01C	Male	SC	1	235	0	1	0
AI01.01C	Male	SC	0	129	0	1	0
AI01.02C	Male	SC	2	157	0	1	0
AI12.03C	Male	SC	0	143	0	1	0
AI40.03C	Female	SC	0	71	0	1	0
AI44.03C	Female	SC	5	84	0	1	0
AI46.01C	Female	SC	72	0	1	0	0
AI46.03C	Female	SC	3	0	0	0	0
AI47.01C - F1	Male	SC	1	12	0	1	0
AI49.02C	Female	SC	6	60	0	1	0
AI49.03C	Female	SC	3	40	0	1	0
AI50.01C	Male	SC	0	198	0	1	0
AI50.02C	Male	SC	43	29	0	0	1
AI51.03C	Male	SC	38	36	0	0	1
AI52.01C	Male	SC	0	89	0	1	0
AI53.01C	Male	SC	1	103	0	1	0
AI53.02C	Male	SC	0	29	0	1	0
AI55.05C	Male	SC	11	45	0	0	1
AI58.01C	Male	SC	1	98	0	1	0
AI75.01C	Female	SC	6	184	0	1	0
AI76.01C	Female	SC	4	58	0	1	0
AI76.02C	Female	SC	9	97	0	1	0
AI76.04C	Female	SC	32	13	0	0	1
AI81.01C	Male	SC	43	67	0	0	1
				Responders	1	23	6
				Count	31	31	31
	SC	average	10.3226	94
	SC	SEM	3.21635	12.0075
AH08.03C	Male	unclassified	0	322	0	1	0
AI33.01C	Female	unclassified	83	1	1	0	0
AI40.01C	Female	unclassified	58	66	0	0	1
AI40.02C	Female	unclassified	110	115	0	0	1
AI44.04C	Female	unclassified	88	1	1	0	0
AI49.01C	Female	unclassified	71	21	0	0	1
				Responders	2	1	3
				Count	6	6	6
				Responders	11	26	28
				Total number fibers tested	66
				Total number of responders	65
