# Supplementary material for: Pruriception and neuronal coding in nociceptor subtypes in human and nonhuman primates
Source: eLife. 2021 Apr 23;10:e64506. doi: 10.7554/eLife.64506 (PMC8064749; doi:10.7554/eLife.64506)
Supplement: Figure 5—figure supplement 1—source data 1. [file elife-64506-fig5-figsupp1-data1.xlsx]

## Sheet: Fig 5-figure supplement 1A
Peak Magnitude of sensation (n=25), panel A
	Itch						Nociceptive sensation
	ALA	BAM	BAM+ALA	HIS	BAM+ALA+HIS		ALA	BAM	BAM+ALA	HIS	BAM+ALA+HIS
average	10.625	17.5972	14.7986	11.0208	14.1319		10.7431	14.9861	13.8403	13.8542	16.1458
SEM	1.54917	2.25552	2.4418	2.38752	2.50839		2.12443	1.99181	1.84362	2.163	2.37333

## Sheet: Fig 5- figure supplement 1B
AUC (n=25), panel B
	Itch						Nociceptive sensation
	ALA	BAM	BAM+ALA	HIS	BAM+ALA+HIS		ALA	BAM	BAM+ALA	HIS	BAM+ALA+HIS
average	29.1042	48.5313	35.7326	63.3819	50.0069		22.2361	35.0139	29.0937	36.9685	35.1771
SEM	6.58078	8.30936	5.8147	22.1692	12.1874		3.74274	5.9508	4.53418	8.02912	6.85956

## Sheet: Fig 5-figure supplement 1C
Duration of sensation (min, n=25), panel C
	Itch						Nociceptive sensation
	ALA	BAM	BAM+ALA	HIS	BAM+ALA+HIS		ALA	BAM	BAM+ALA	HIS	BAM+ALA+HIS
average	5.96	6.4	5.82	9.96	7.86		4.86	5.68	5.44	7.2	6.52
SEM	0.70706	0.699405	0.731938	1.45227	1.17775		0.48949	0.708802	0.691207	1.15614	1.02286
