# Supplementary material for: Pruriception and neuronal coding in nociceptor subtypes in human and nonhuman primates
Source: eLife. 2021 Apr 23;10:e64506. doi: 10.7554/eLife.64506 (PMC8064749; doi:10.7554/eLife.64506)
Supplement: Figure 5—source data 1. [file elife-64506-fig5-data1.xlsx]

## Sheet: Fig 5 A
Number of subject reporting different sensations
	STIMULUS
	ALA	BAM	BAM+ALA	HIS	BAM+ALA+HIS
Quality
itch+prick/sting+burn	20	23	22	26	22
itch+prick/sting	5	5	5	2	5
itch+burn	1	1	0	1	0
prick/sting+burn	2	0	0	0	1
itch	1	0	2	0	1
total	29	29	29	29	29

## Sheet: Fig 5 B-G
TIME COURSE DATA (panels B-G)
Quality	Itch magnitude ratings (n=29)											Pricking/Stinging magnitude ratings (n=29)											Burning magnitude ratings (n=29)
Stimulus	ALA		BAM		BAM+ALA		HIS		BAM+ALA+HIS			ALA		BAM		BAM+ALA		HIS		BAM+ALA+HIS			ALA		BAM		BAM+ALA		HIS		BAM+ALA+HIS
Time (min)	average	SEM	average	SEM	average	SEM	average	SEM	average	SEM		average	SEM	average	SEM	average	SEM	average	SEM	average	SEM		average	SEM	average	SEM	average	SEM	average	SEM	average	SEM
0	0.981801	0.398788	3.34052	1.31153	0.760297	0.366825	2.22701	0.936823	4.00503	1.19089		3.05316	0.956642	6.11231	1.23437	3.69373	0.980503	8.15374	1.44659	11.1949	2.10782		1.23324	0.458431	2.97534	1.36427	1.64033	0.698417	4.85512	1.39837	4.22653	1.29214
0.5	3.64583	1.1525	8.36327	1.70574	6.25599	1.44528	5.20235	1.37088	8.97989	1.48238		5.99258	1.73925	9.52466	1.5688	8.36327	1.60163	8.42912	1.45464	7.59698	1.2743		2.31681	0.763667	5.02874	1.69764	3.9751	1.19166	5.18439	1.24865	4.95091	1.20155
1	6.98635	1.0992	13.5117	1.93901	11.7696	1.91263	6.21408	1.5831	11.2967	2.06727		6.19013	1.15793	11.2548	1.82203	9.27921	1.74634	7.93822	1.87996	7.9921	1.67952		2.87356	0.857144	4.34626	1.59098	4.43606	1.02216	5.08836	1.47303	4.017	1.11697
1.5	6.97438	1.11035	12.8592	1.81372	11.6319	1.73175	6.24401	2.05511	10.7459	2.01332		5.75311	1.17602	9.0158	1.67829	7.67481	1.36837	5.6693	1.41647	7.50718	1.60286		2.78975	0.878979	4.46001	1.36488	3.84938	0.988051	3.71744	1.00998	3.99904	1.08066
2	6.03448	1.04428	10.8178	1.61567	9.45881	1.54564	6.11231	2.04819	7.61494	1.47133		4.19061	0.808696	6.37572	1.45877	5.32807	1.21432	4.48396	1.09025	4.44804	1.05702		2.02347	0.635551	2.61614	1.15657	3.5261	0.945194	3.31656	0.875568	3.04119	0.860639
2.5	5.40589	1.07051	8.74042	1.35923	6.70498	1.1302	5.59148	1.96176	7.08214	1.48984		2.89751	0.614705	4.86111	1.07726	4.08884	1.02033	2.92744	0.713772	3.28065	0.824819		1.67026	0.554344	2.2749	0.793454	2.62811	0.705294	3.0771	0.885239	2.15517	0.649015
3	5.27419	1.2447	6.56729	1.14271	5.54957	0.885318	5.19037	1.84644	5.38793	1.29456		2.4545	0.522674	3.3944	0.746084	3.14296	0.72992	2.75383	0.717728	2.7658	0.868857		1.41882	0.484665	2.08932	0.735205	1.77802	0.539349	2.52035	0.861596	1.76006	0.559208
3.5	3.44828	0.861144	4.92696	0.966387	3.76557	0.641828	5.31011	1.95358	5.60943	1.42737		1.90972	0.458942	2.69397	0.612233	2.01748	0.489792	2.20905	0.655902	1.95163	0.647972		0.903975	0.320605	1.44277	0.604738	1.23922	0.466011	2.34076	0.872796	1.341	0.461853
4	2.97534	0.8457	4.28041	1.05919	2.61015	0.57613	4.93894	1.85981	4.75934	1.3409		1.7421	0.482693	1.78999	0.455954	1.70019	0.420494	1.94564	0.577846	1.62835	0.582727		0.724377	0.219219	1.16739	0.469837	1.09555	0.327327	1.84986	0.726935	1.04167	0.450469
4.5	2.35872	0.832322	3.4363	0.841525	2.04143	0.534002	5.19037	1.91744	3.77155	1.01352		1.04765	0.327698	1.32902	0.372454	1.12548	0.333376	1.41882	0.536865	1.43678	0.476444		0.239464	0.0911879	0.963841	0.383902	0.838123	0.293693	1.41284	0.629915	1.02371	0.485272
5	2.16715	0.805752	2.83166	0.828878	1.341	0.369638	4.72941	1.961	3.37045	1.03578		0.712404	0.21631	1.11351	0.33455	0.939895	0.384548	1.2033	0.440812	0.999761	0.428838		0.28137	0.101307	0.778257	0.335786	0.592672	0.228021	1.37093	0.636065	0.562739	0.261999
5.5	1.87979	0.820625	3.02921	0.935133	1.32304	0.367237	4.3762	1.80742	3.09507	0.990815		0.443008	0.183871	1.18534	0.35724	0.640565	0.249677	1.22725	0.390455	0.874042	0.413247		0.347222	0.150666	0.75431	0.321077	0.502874	0.143676	1.35297	0.59532	0.622605	0.251511
6	1.46671	0.622786	2.50838	0.889976	1.04167	0.348258	4.70546	1.78417	2.32878	0.773245		0.323276	0.153018	0.718391	0.280828	0.568726	0.225171	0.933908	0.356935	0.670498	0.28025		0.323276	0.13947	0.610632	0.251598	0.50886	0.155167	1.32902	0.556867	0.401102	0.208434
6.5	1.4727	0.626884	1.76604	0.745083	0.856082	0.341952	4.17864	1.663	2.13721	0.92972		0.347222	0.202209	0.676485	0.280478	0.401101	0.172745	0.999761	0.377929	0.586686	0.3761		0.0239463	0.0224373	0.371169	0.216858	0.389128	0.132067	1.37093	0.581368	0.299329	0.144647
7	1.37093	0.604873	1.68822	0.628803	0.886015	0.303055	4.28041	1.61639	1.8738	0.762739		0.155651	0.124715	0.287356	0.157115	0.335249	0.165767	1.17936	0.477832	0.419061	0.250081		0.0239463	0.0224373	0.197557	0.133287	0.305316	0.108693	1.14344	0.522483	0.221504	0.124687
7.5	0.927921	0.451287	1.35297	0.558578	0.562739	0.215057	3.72965	1.51641	1.46671	0.609198		0.125718	0.117796	0.29933	0.156481	0.371169	0.159361	0.975814	0.371787	0.419061	0.307424		0.00598659	0.00560934	0.251437	0.176477	0.137692	0.0593563	0.892002	0.377746	0.221504	0.140881
8	1.01173	0.550565	0.760297	0.245333	0.538793	0.241452	3.74761	1.22491	1.49066	0.588851		0.119732	0.101229	0.221504	0.147982	0.341236	0.164139	1.35896	0.655802	0.287356	0.179053		0.00598659	0.00560934	0.215517	0.139308	0.0598659	0.0316675	0.886015	0.422158	0.26341	0.148492
8.5	0.778257	0.447514	0.574713	0.179868	0.323276	0.149366	3.3465	1.08402	1.10153	0.4178		0.0957854	0.0897494	0.179598	0.129694	0.161638	0.0890635	0.886015	0.339746	0.257423	0.185414		0	0	0.173611	0.135192	0.0478927	0.0254874	0.646552	0.310945	0.185584	0.130593
9	0.856082	0.467051	0.502874	0.182688	0.269397	0.13338	3.13099	1.072	1.09555	0.448803		0.0897989	0.0841401	0.149665	0.0949326	0.131705	0.0835414	0.598659	0.252374	0.4909	0.315087		0	0	0.143678	0.0980514	0.0598659	0.035534	0.652538	0.328189	0.167625	0.119277
9.5	0.927921	0.565285	0.401102	0.159448	0.24545	0.14932	2.19109	0.707807	0.796216	0.390876		0.0478927	0.0448747	0.107759	0.0664322	0.125718	0.0931624	0.419061	0.182472	0.191571	0.143515		0	0	0.155651	0.0877141	0.0838123	0.0476399	0.347222	0.181187	0.185584	0.141651
10	0.472941	0.254872	0.233477	0.111603	0.22749	0.126782	2.35273	0.711099	1.05364	0.462243		0.0778257	0.0729214	0.0838122	0.0546269	0.0897988	0.0688552	0.478927	0.21546	0.101772	0.0725921		0	0	0.0838122	0.0597388	0.0478927	0.0312154	0.401102	0.233416	0.173611	0.127277
10.5	0.383142	0.214458	0.22749	0.110346	0.251437	0.13032	2.50239	0.701914	0.694444	0.297167		0.0179598	0.016828	0.0359195	0.0234115	0.0897989	0.0597644	0.287356	0.142495	0.233477	0.171488		0	0	0.0478927	0.0351317	0.0359196	0.0284242	0.389128	0.201181	0.185584	0.130043
11	0.317289	0.171848	0.155651	0.116082	0.155651	0.109161	2.06537	0.600533	0.688458	0.28073		0.0419061	0.0392654	0.0299329	0.0229517	0.113745	0.0751158	0.514847	0.204332	0.149665	0.124925		0	0	0.029933	0.0280467	0.0538793	0.0353478	0.425048	0.215448	0.179598	0.117155
11.5	0.179598	0.098362	0.119732	0.0962963	0.191571	0.106621	2.55627	0.859275	0.592672	0.309515		0.0239463	0.0224373	0.0239463	0.0224373	0.0598659	0.0398429	0.670498	0.320014	0.113745	0.0804415		0	0	0.0359196	0.033656	0.0419061	0.0392654	0.365182	0.228801	0.137692	0.108877
12	0.161638	0.101665	0.107759	0.0953429	0.113745	0.100943	2.4126	0.754089	0.586686	0.259629		0.0179598	0.016828	0.0179598	0.016828	0.0957854	0.0743073	0.287356	0.117397	0.0239463	0.0235299		0	0	0.0119732	0.0112187	0.0119732	0.0112187	0.329262	0.212392	0.125718	0.101912
12.5	0.0538793	0.0371401	0.107759	0.0900882	0.0957854	0.0897494	2.08333	0.649097	0.592672	0.277783		0	0	0.0119732	0.0112187	0.0359196	0.033656	0.592672	0.387746	0.0778257	0.0608081		0	0	0.0359196	0.033656	0	0	0.239464	0.171098	0.125718	0.0976004
13	0.131705	0.112386	0.0598659	0.0560934	0.113745	0.0863784	1.89176	0.622452	0.448994	0.194636		0	0	0.0119732	0.0112187	0.0359196	0.033656	0.341236	0.162077	0.029933	0.0294124		0	0	0.00598659	0.00560934	0	0	0.107759	0.0809469	0.119732	0.0961974
13.5	0.0478927	0.0351317	0.0538793	0.050484	0.107759	0.0900882	1.68822	0.599072	0.556753	0.285024		0	0	0.0419061	0.0392654	0.0239463	0.0224373	0.365182	0.185747	0.179598	0.132649		0	0	0.0179598	0.016828	0	0	0.125718	0.0938565	0.101772	0.0792029
14	0.0419061	0.0392654	0.0119732	0.0112187	0.0957854	0.0897494	1.84387	0.579273	0.437021	0.213113		0	0	0.0119732	0.0112187	0.0419061	0.0392654	0.149665	0.0836942	0.0419061	0.0411773		0	0	0.0119732	0.0112187	0	0	0.215517	0.174055	0.0897988	0.0721481
14.5	0.0838123	0.0785308	0.0179598	0.016828	0.107759	0.100968	1.95761	0.668137	0.371169	0.199044		0	0	0.0119732	0.0112187	0.0359196	0.033656	0.24545	0.146523	0.0179598	0.0176474		0	0	0.00598659	0.00560934	0	0	0.101772	0.0836056	0.131705	0.107644
15	0	0	0.0179598	0.016828	0.0897989	0.0841401	1.70618	0.579004	0.365182	0.214909		0	0	0.0179598	0.016828	0.0119732	0.0112187	0.185584	0.145643	0.113745	0.0864543		0	0	0.0119732	0.0112187	0	0	0.143678	0.12416	0.107759	0.0893643
15.5	0	0	0.00598659	0.00560934	0.0598659	0.0560934	1.67625	0.564156	0.347222	0.228904		0	0	0.0119732	0.0112187	0.0179598	0.016828	0.0419061	0.0411773	0.22749	0.18101		0	0	0.0119732	0.0112187	0	0	0.119732	0.0904365	0.125718	0.0938565
16	0.0419061	0.0392654	0.00598659	0.00560934	0.0359196	0.033656	1.62237	0.584745	0.269397	0.189045		0	0	0.0119732	0.0112187	0.0179598	0.016828	0.0957854	0.0736064	0.251437	0.203823		0	0	0.00598659	0.00560934	0	0	0.143678	0.12416	0.107759	0.077786
16.5	0.0478927	0.0448747	0	0	0.0119732	0.0112187	1.4308	0.527476	0.305316	0.208357		0	0	0	0	0	0	0.0179598	0.0176474	0.137692	0.118341		0	0	0	0	0	0	0.149665	0.135388	0.101772	0.0792029
17	0.0538793	0.050484	0	0	0.0239463	0.0224373	1.39488	0.504473	0.305316	0.21295		0	0	0	0	0	0	0.0119732	0.0117649	0.119732	0.0961974		0	0	0	0	0	0	0.149665	0.124925	0.113745	0.0864543
17.5	0	0	0	0	0.0179598	0.016828	1.28712	0.458943	0.131705	0.107644		0	0	0	0	0	0	0.119732	0.106118	0.0239463	0.0235299		0	0	0	0	0	0	0.101772	0.0792029	0.0778257	0.0653533
18	0.0658525	0.0617027	0	0	0.0179598	0.016828	1.05364	0.393473	0.191571	0.143265		0	0	0	0	0	0	0.101772	0.0792029	0.0179598	0.0176474		0	0	0	0	0	0	0.113745	0.0905048	0.0778257	0.0653533
18.5	0	0	0	0	0.0119732	0.0112187	1.0716	0.455695	0.149665	0.129986		0	0	0	0	0	0	0.0598659	0.0480987	0.0119732	0.0117649		0	0	0	0	0	0	0.167625	0.152976	0.0897988	0.0680582
19	0	0	0	0	0	0	0.850096	0.393055	0.101772	0.0725921		0	0	0	0	0	0	0.0897988	0.0721481	0.0239463	0.0235299		0	0	0	0	0	0	0.137692	0.118341	0.0778257	0.0706246
19.5	0	0	0	0	0	0	0.987787	0.436989	0.0359196	0.0352948		0	0	0	0	0	0	0.0838122	0.0664596	0.0239463	0.0235299		0	0	0	0	0	0	0.131705	0.117817	0.0598659	0.0408458
20	0	0	0	0	0	0	0.927921	0.424523	0.0359196	0.0352948		0	0	0	0	0	0	0.0897988	0.0680582	0.0239463	0.0235299		0	0	0	0	0	0	0.143678	0.119152	0	0

## Sheet: Fig 5H
PEAK MAGNITUDE SENATION panel H (n=29)
	Itch							Pricking/Stinging							Burning
	ALA	BAM	BAM+ALA	HIS	BAM+ALA+HIS			ALA	BAM	BAM+ALA	HIS	BAM+ALA+HIS			ALA	BAM	BAM+ALA	HIS	BAM+ALA+HIS
average	10.1173	16.523	14.3798	10.4466	13.6734		average	9.27323	13.0268	11.8834	12.8891	14.308		average	4.33429	7.11207	6.77682	8.73443	7.38745
SEM	1.4066	1.91913	1.99475	2.05186	2.17524		SEM	1.8416	1.79292	1.7563	1.83293	2.13545		SEM	1.00149	1.79791	1.3539	1.7225	1.50761

## Sheet: Fig 5I
AUC (n=17), panel I
Quality	Itch							Pricking/Stinging							Burning
Stimulus	ALA	BAM	BAM+ALA	HIS	BAM+ALA+HIS			ALA	BAM	BAM+ALA	HIS	BAM+ALA+HIS			ALA	BAM	BAM+ALA	HIS	BAM+ALA+HIS
average	32.4449	47.0588	39.951	68.0862	51.4604		average	24.1064	40.0633	30.7802	32.6236	33.9359		average	13.7153	24.326	18.316	32.3678	24.3975
SEM	9.13846	7.14824	7.93285	30.7771	16.5773		SEM	4.42259	7.91333	6.2785	7.53872	8.87454		SEM	3.73465	8.01445	4.30026	10.2877	6.66055

## Sheet: Fig 5J
Duration of sensation (min, n=17), panel J
Quality	Itch							Pricking/Stinging							Burning
Stimulus	ALA	BAM	BAM+ALA	HIS	BAM+ALA+HIS			ALA	BAM	BAM+ALA	HIS	BAM+ALA+HIS			ALA	BAM	BAM+ALA	HIS	BAM+ALA+HIS
average	7.08824	7.47059	6.35294	9.88235	8.58824		average	5.35294	6.5	5.94118	8.32353	6.67647		average	4.20588	5.32353	5.23529	6.82353	6.38235
SEM	0.914784	0.874969	0.98869	1.61253	1.5608		SEM	0.63124	0.907485	0.944102	1.5747	1.30112		SEM	0.545804	1.0091	0.763503	1.52789	1.36091
