# Supplementary material for: Pruriception and neuronal coding in nociceptor subtypes in human and nonhuman primates
Source: eLife. 2021 Apr 23;10:e64506. doi: 10.7554/eLife.64506 (PMC8064749; doi:10.7554/eLife.64506)
Supplement: Figure 6—source data 1. [file elife-64506-fig6-data1.xlsx]

## Sheet: Fig 6A
		Alloknesis in cm2, (n=29)						Hyperalgesia in cm2, (n=29)						Hyperknesis in cm2 (n=29)
	Stimulus	ALA	BAM	BAM+ALA	HIS	BAM+ALA+HIS		ALA	BAM	BAM+ALA	HIS	BAM+ALA+HIS		ALA	BAM	BAM+ALA	HIS	BAM+ALA+HIS
	average	3.651	4.04148	3.73845	17.3978	12.0197		5.70134	8.68138	10.6093	20.9837	19.1266		5.41024	7.18386	9.955	15.3894	15.8868
	SEM	0.903049	1.11936	1.37805	3.74087	2.8923		1.66076	1.94014	2.42494	3.29151	3.43279		1.48699	1.8625	2.4603	2.8328	3.1224

## Sheet: Fig 6B
		Wheal in cm2, (n=29)						Flare in cm2, (n=29)
	Stimulus	ALA	BAM	BAM+ALA	HIS	BAM+ALA+HIS		ALA	BAM	BAM+ALA	HIS	BAM+ALA+HIS
	average	0.291793	0.517552	0.588034	1.85776	1.88331		1.23131	5.54872	5.67455	21.5298	20.733
	SEM	0.0427648	0.0684296	0.0771464	0.136951	0.173584		0.630977	1.41824	0.983274	2.95708	2.55318
